# Supplementary material
Source: Springer Nature journal article supplement (https://www.springermedizin.de/resource/supplementary/12865_2005_81_MOESM10_ESM.pdf/9428468)

## OT-1 Transgene Detection after CD8+T Cell Adoptive Transfer by qPCR in Paraffin-Embedded Archival Material

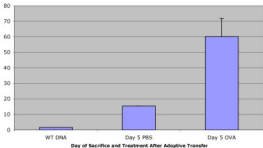

Supplement: MOESM10 [file 9428468]
